# Supplementary material for: C-jun Inhibits Mammary Apoptosis In Vivo
Source: PubMed Central journal article supplement — Mol Biol Cell. 2010 Dec 1;21(23):4264–74. doi: 10.1091/mbc.E10-08-0705 (PMC2993753; doi:10.1091/mbc.e10-08-0705), 2010-12-01

### Supplemental Figure 1:

Mammary glands whole mounts and section from 8 weeks and 2 days post involution of bi-transgenic mice. (A) Whole mounts of 8 weeks old mice examined using whole mounts from wild type ( $cre^+/c-jun^{+/+}$ ), and knockout ( $cre^+/c-jun^{-/-}$ ) mice. Bi-transgenic mice were assessed for terminal end buds, mammary ducts lengths and branching shown on right. (B,C). The number of cells per field within the mammary gland was assessed from H and E stained slides. Regimens of the area cover the number of cells mammary glands were as shown. The  $c-jun^{fl/fl}$  MMTV-Cre mice showed a reduction in both number of cells lining the glands and the specific area covered compared with wild type controls.  $*p \leq 0.05$ , Data are mean  $\pm$  SEM (D). TUNEL staining as a marker of apoptosis in wt vs  $c-jun^{-/-}$  mammary glands. Representative examples are shown.

### Supplemental Figure 2:

**$c-jun^{-/-}$  cells are more sensitive to  $H_2O_2$  mediated cell death.** (A,B) Proliferation assays conducted of  $c-jun^{fl/fl}$  MEF treated with either no virus, Ad vector or Ad-Cre using either cell counting or OD 540 (C). The percentage of cells surviving in the presence of increasing concentrations of  $H_2O_2$  is shown. Data are means  $\pm$  SEM for  $N > 3$  separate experiments.

### Supplemental Figure 3:

Schematic representation of a model in which endogenous c-jun inhibits apoptosis and ROS production.

# Supplemental Fig. 1

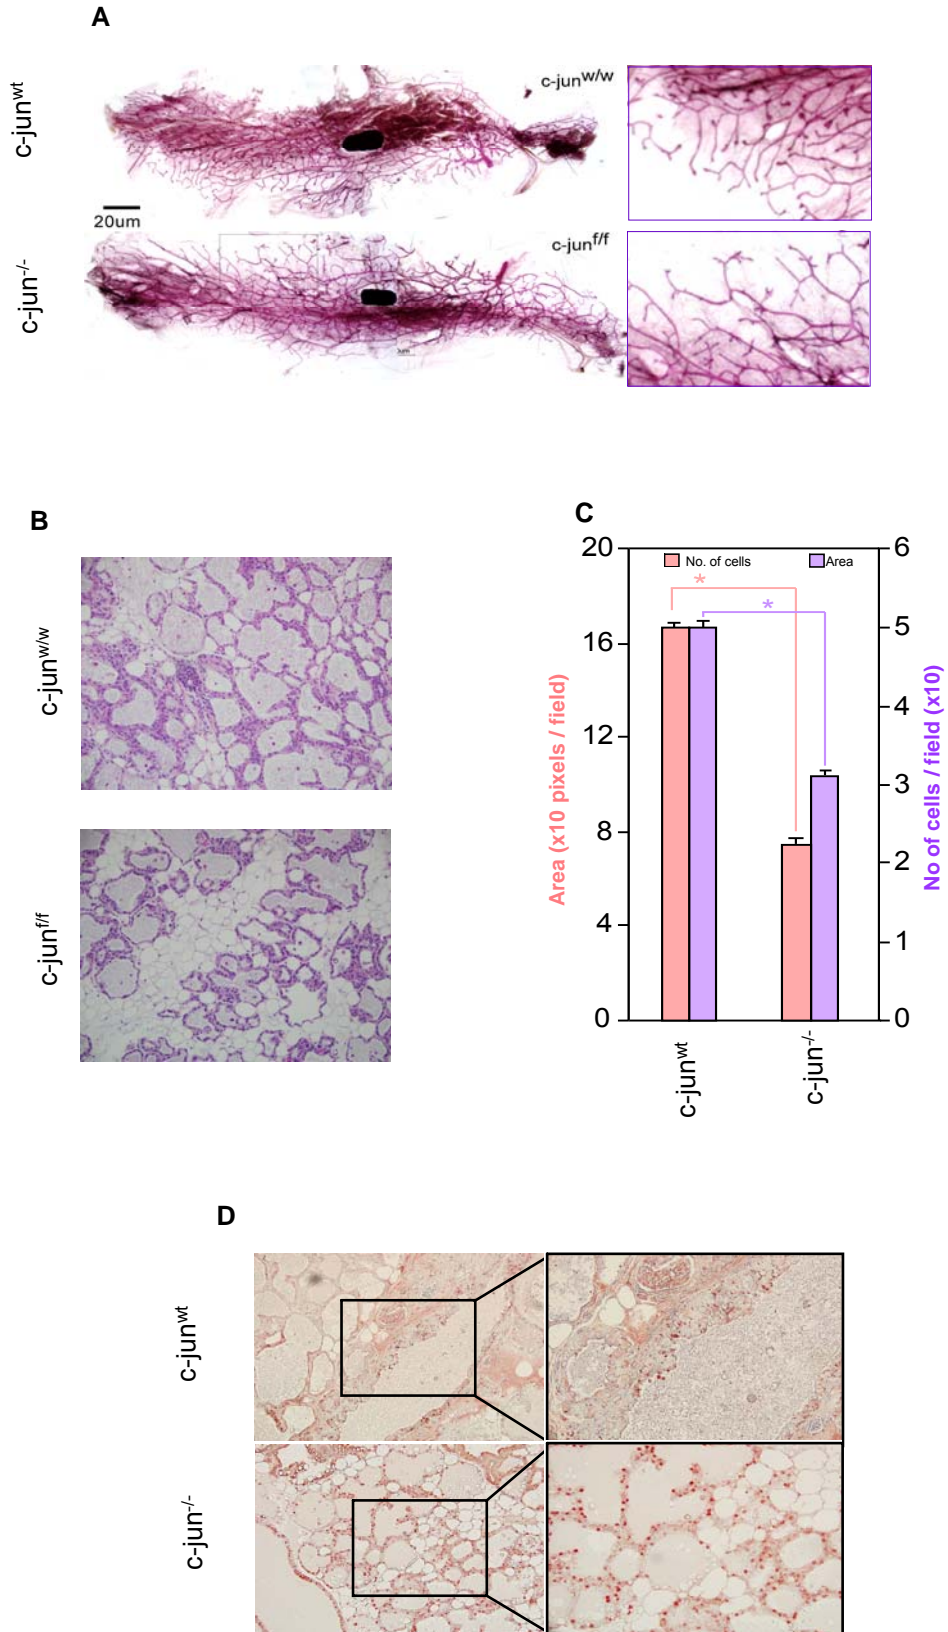

# Supplemental Fig. 1

A

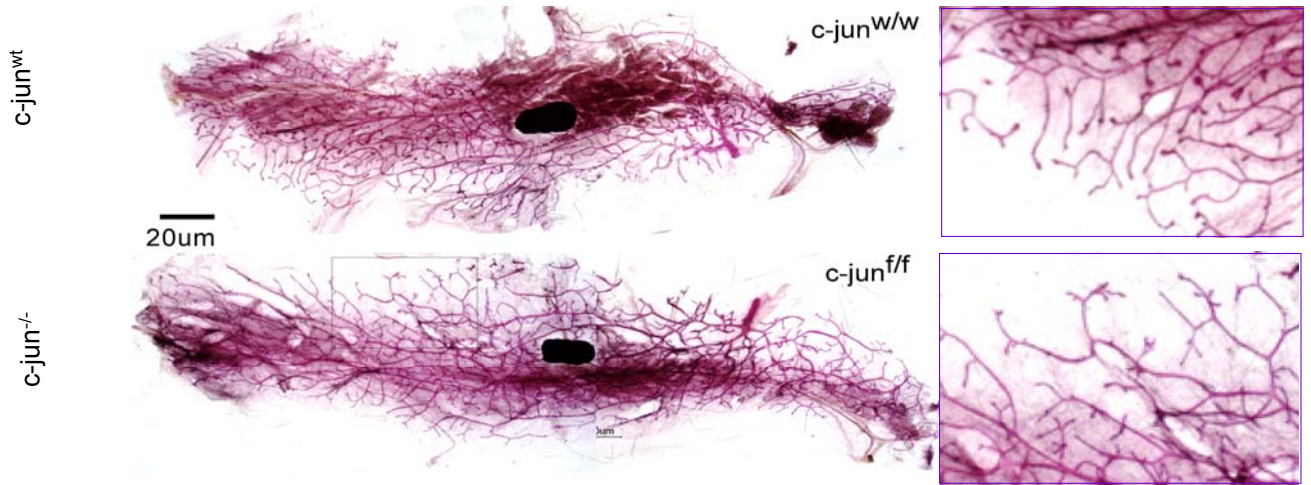

# Supplemental Fig. 1

**B**

c-jun<sup>w/w</sup>

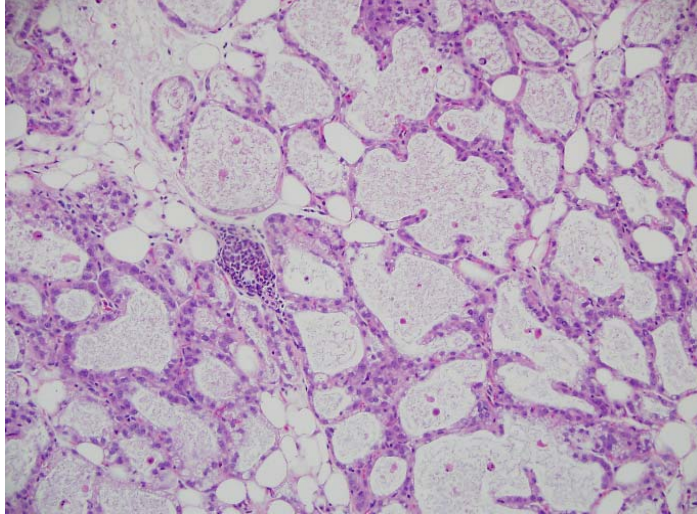

c-jun<sup>f/f</sup>

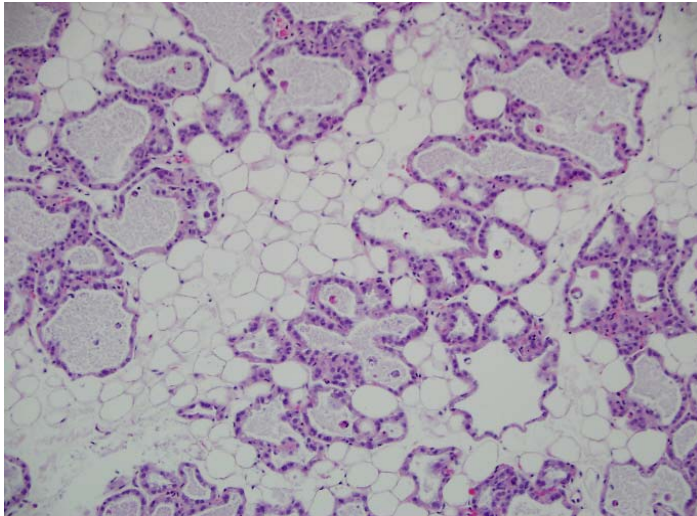

# Supplemental Fig. 1

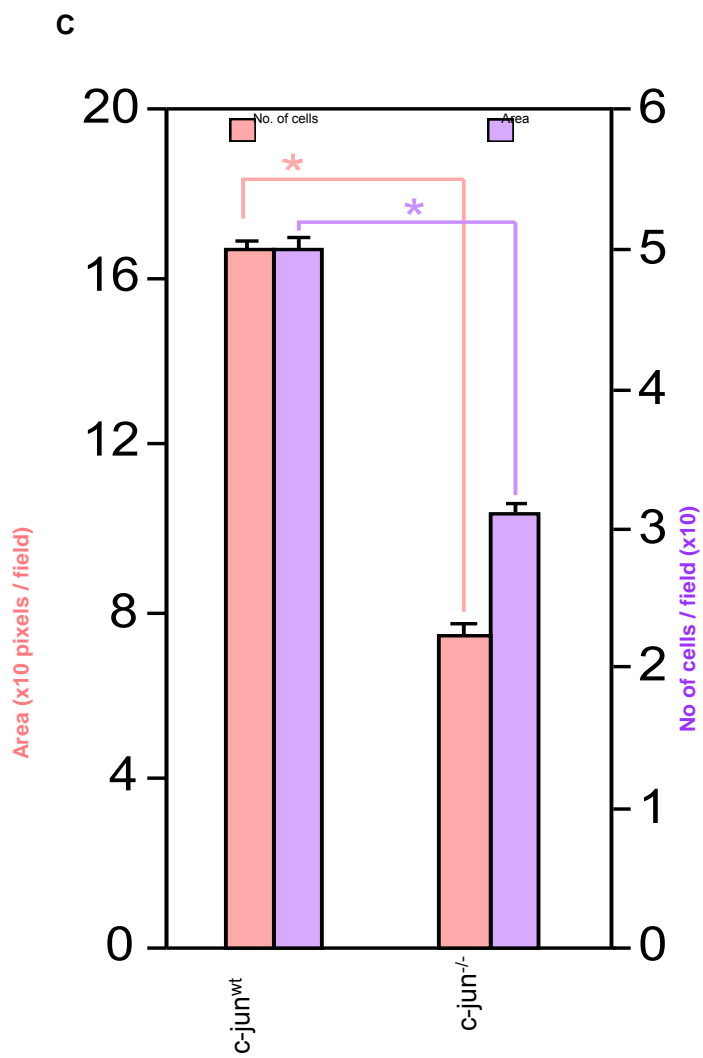

Supplemental Fig. 1

D

*c-jun*<sup>wt</sup>

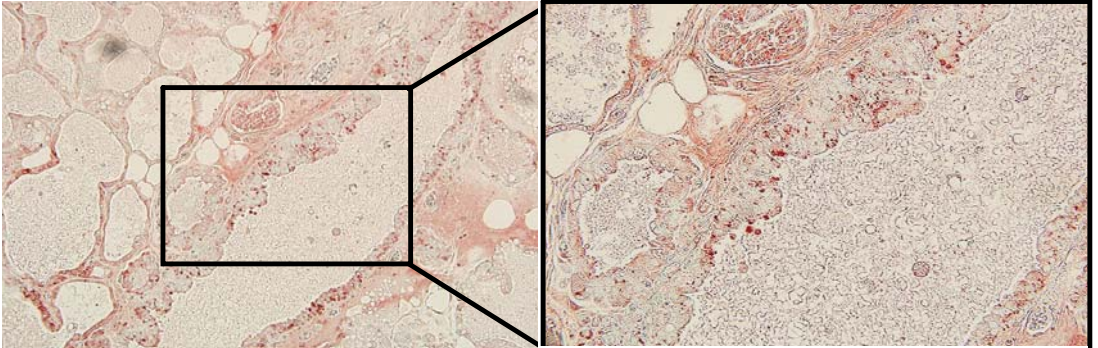

*c-jun*<sup>-/-</sup>

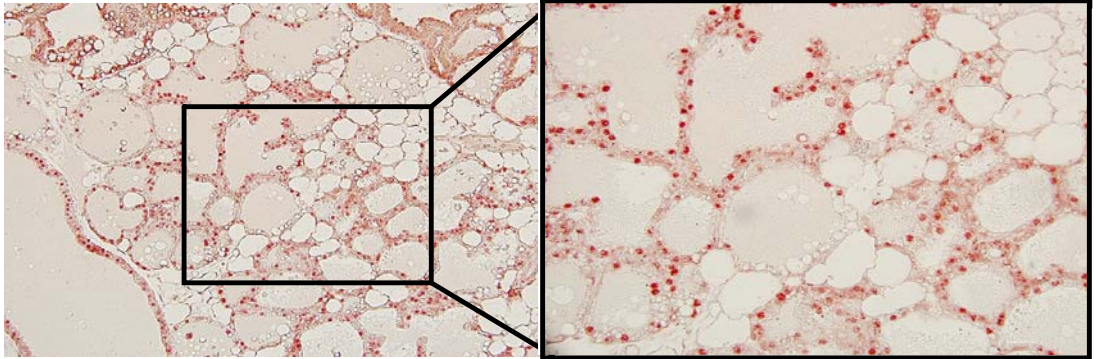

# Supplemental Fig. 2

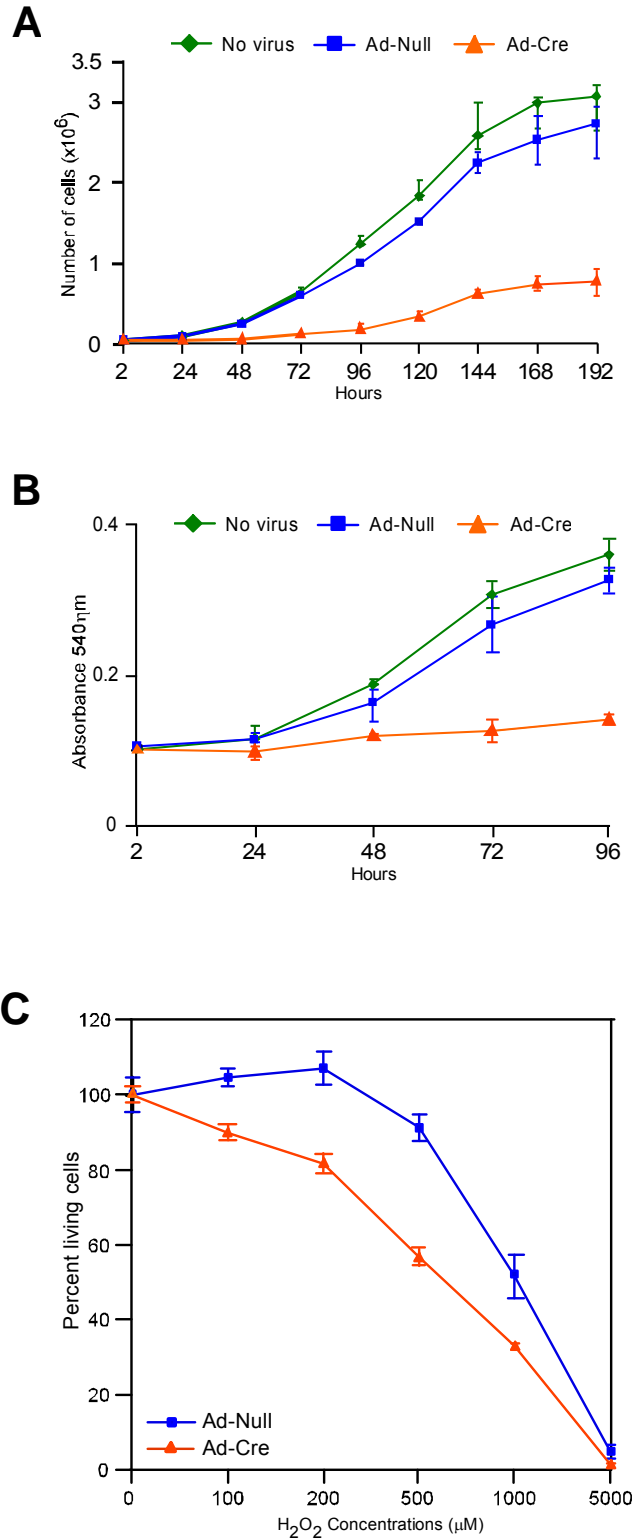

Supplemental Fig. 3

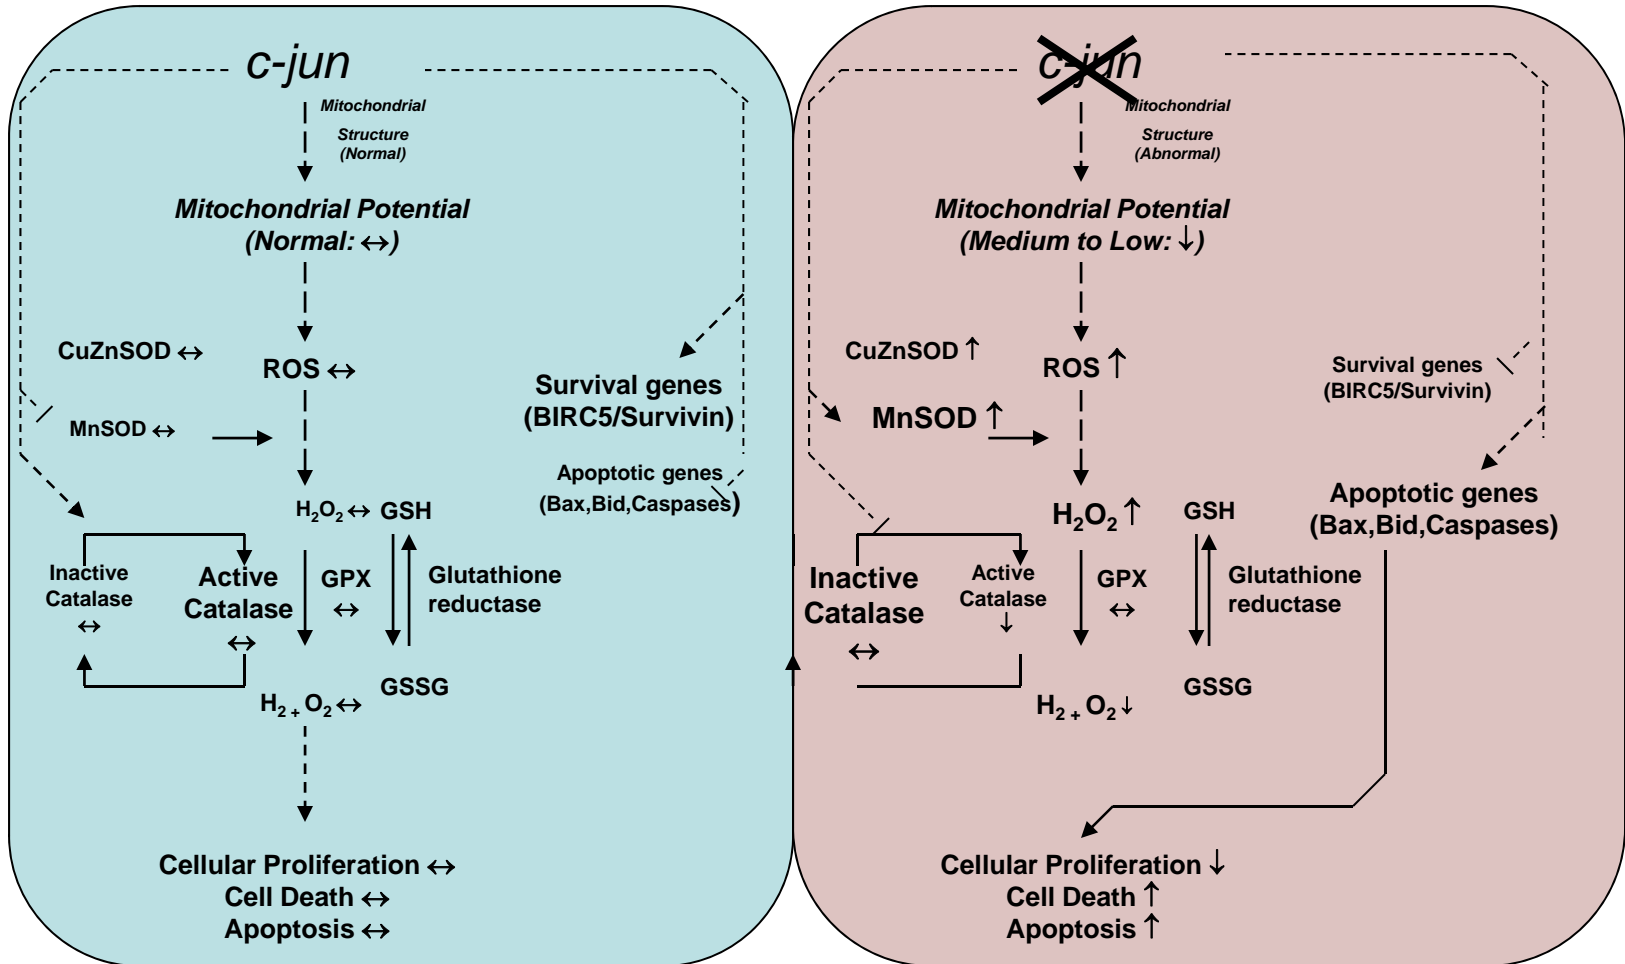

Supplement: E10-08-0705_1.pdf [file E10-08-0705_1.pdf]
